# Supplementary material for: Coping with Stress, Executive Functions, and Depressive Symptoms: Focusing on Flexible Responses to Stress
Source: MDPI journal article supplement (doi:10.3390/jcm10143122), 2021-07-15
Supplement: s1 [file s1]

# Supplementary Table S1

Zero-Order Between the Coping Flexibility Scale-Revised Scores and Other Variable Scores.

| Variable            | Abandonment    |                | Re-coping      |                |
|---------------------|----------------|----------------|----------------|----------------|
|                     | <i>r</i> value | <i>p</i> value | <i>r</i> value | <i>p</i> value |
| SCWT I <sub>G</sub> | 0.208          | 0.003          | 0.087          | 0.220          |
| WCST PE             | -0.169         | 0.016          | -0.055         | 0.437          |
| WCST NPE            | -0.143         | 0.044          | -0.092         | 0.197          |
| Depression          | -0.289         | < 0.001        | -0.303         | < 0.001        |

*Note.* SCWT and WCST is the Stroop Color and Word Test and the Wisconsin Card Sorting Test, respectively. I<sub>G</sub>, PE, and NPE is interference score, perseverative error, and nonperseverative error, respectively.
